1 **Target Capture Sequencing of SARS-CoV-2 Genomes Using the ONETest Coronaviruses**

2 **Plus**

3

4 Shing H. Zhan<sup>1,†,\*</sup>, Sepideh M. Alamouti<sup>1,†</sup>, Brian S. Kwok<sup>1</sup>, Meng-Hsun Lee<sup>1</sup>, Jaswinder

5 Khattri<sup>1</sup>, Habib Daneshpajouh<sup>1</sup>, Herbert J. Houck<sup>2</sup>, Kenneth H. Rand<sup>2</sup>

6

7 <sup>1</sup>Fusion Genomics Corporation, Burnaby, British Columbia, Canada.

8 <sup>2</sup>Department of Pathology, Immunology, and Laboratory Medicine, University of Florida College

9 of Medicine, Gainesville, Florida, USA.

10 <sup>†</sup>Equal contribution.

11 \*Correspondence: Shing H. Zhan. Address: Fusion Genomics Corporation, Discovery 1, Room

12 1450, 8888 University Drive, Burnaby, British Columbia V5A 1S6, Canada. E-mail:

13 szhan@fusiongenomics.com or info@fusiongenomics.com.

14

15 Running title: Target capture NGS for SARS-CoV-2.

16

## 17 **ABSTRACT**

### 18 **Background**

19 Genomic sequencing is important to track and monitor genetic changes in SARS-CoV-2. We  
20 introduce a target capture next-generation sequencing methodology, the ONETest  
21 Coronavirus Plus, to sequence SARS-CoV-2 genomes and select genes of other respiratory  
22 viruses simultaneously.

### 23 **Methods**

24 We applied the ONETest on 70 respiratory samples (collected in Florida, USA between May  
25 and July, 2020), in which SARS-CoV-2 had been detected by a qualitative PCR assay. For 48  
26 (69%) of the samples, we also applied the ARTIC protocol for Illumina sequencing. All the  
27 libraries were sequenced as 2x150 nucleotide reads on an Illumina instrument. The ONETest  
28 data were analyzed using an in-house pipeline and the ARTIC data using a published pipeline  
29 to produce consensus SARS-CoV-2 genome sequences, to which lineages were assigned  
30 using *pangolin*.

### 31 **Results**

32 Of the 70 ONETest libraries, 45 (64%) had a complete or near-complete SARS-CoV-2 genome  
33 sequence (> 29,000 bases and with > 90% of its bases covered by at least 10 reads). Of the 48  
34 ARTIC libraries, 25 (52%) had a complete or near-complete SARS-CoV-2 genome sequence.  
35 In 24 out of 34 (71%) samples in which both the ONETest and ARTIC sequences were  
36 complete or near-complete and in which lineage could be assigned to both the ONETest and  
37 ARTIC sequences, the SARS-CoV-2 lineage identified was the same.

### 38 **Conclusions**

39 The ONETest can be used to sequence the SARS-CoV-2 genomes in archived samples and  
40 thereby enable detection of circulating and emerging SARS-CoV-2 variants. Target capture  
41 approaches, such as the ONETest, are less prone to loss of sequence coverage probably due  
42 to amplicon dropouts encountered in amplicon approaches, such as ARTIC. With its added

43 value of characterizing other major respiratory pathogens, although not assessed in this study,  
44 the ONETest can help to better understand the epidemiology of infectious respiratory disease in  
45 the post COVID-19 era.

46

47 **Keywords:** genome sequencing, target hybridization, respiratory disease.

## 48 INTRODUCTION

49 SARS-CoV-2 genome sequencing is widely achieved using the amplicon next-generation  
50 sequencing (NGS) ARTIC methodology <sup>1</sup>. Because of its ease of use and low cost of  
51 sequencing, ARTIC has become the method of choice among many laboratories.  
52 Notwithstanding its advantages, the ARTIC PCR primer set needs to be maintained and updated  
53 due to amplicon dropouts <sup>1</sup>, which may be caused by primer interactions <sup>2</sup> and mutations at  
54 primer binding sites <sup>3</sup>. Without continual upkeep, amplicon sequencing may yield incomplete  
55 SARS-CoV-2 genome sequences and therefore create a loss of valuable genetic information.  
56 This could weaken our vigilance towards SARS-CoV-2 mutations, which may impact our  
57 diagnostic, therapeutic, and vaccination efforts <sup>4</sup>, and SARS-CoV-2 lineages, especially variants  
58 of concern such as B.1.1.7 and B.1.135 that may enhance the virus' transmissibility or lethality  
59 <sup>5,6</sup>.

60  
61 Alternatively, SARS-CoV-2 genome sequencing can be accomplished using probe-based liquid-  
62 phase hybridization followed by NGS <sup>3,7,8</sup>. A major appeal of target capture NGS methodologies  
63 is its capacity to enrich samples for a practically limitless repertoire of genetic loci without  
64 needing to constantly update the primers and or deal with multiplexing issues encountered with  
65 amplicon-based approaches. Indeed, virome target capture NGS methodologies have been  
66 developed (e.g., <sup>9,10</sup>). Another advantage is that target capture NGS approaches perform better  
67 than amplicon NGS approaches in degraded samples (e.g., archived FFPE samples <sup>11</sup>). A  
68 validated target capture NGS solution with end-to-end automation for concurrent detection and  
69 sequence characterization of SARS-CoV-2 and other common respiratory pathogens can be a  
70 powerful tool for genomic surveillance of respiratory infectious disease in the post COVID-19  
71 era and can play a crucial role in timely generation and dissemination of genomic data.

72

73 The ONETest™ is a pre-commercial target capture NGS platform developed by Fusion  
74 Genomics Corp. (Burnaby, BC, Canada). The platform offers a sequencer-agnostic end-to-end  
75 NGS workflow that includes library preparation, probe-based liquid phase hybridization, and  
76 cloud-based bioinformatics analysis. The ONETest™ Coronaviruses Plus  
77 (<http://www.fusiongenomics.com/onetestplatform/coronavirusesplus/>), based on the ONETest™  
78 platform, has been demonstrated to enrich samples for select genetic loci of various respiratory  
79 viruses (e.g., influenza A viruses) in a separate study (*in preparation*). Furthermore, the  
80 ONETest™ EnviroScreen, also based on the ONETest™ platform, has been shown to detect  
81 diverse subtypes of avian influenza viruses in wetland sediments <sup>12</sup>.

82

83 To capture the full-length genome of SARS-CoV-2, we have expanded the probe design of the  
84 ONETest Coronaviruses Plus. Here, using the updated ONETest, we sequenced the SARS-  
85 CoV-2 genomes in 70 retrospectively selected samples, which were initially tested at the  
86 University of Florida (UF) Health Shands Hospital Clinical Laboratory during the COVID-19  
87 pandemic in 2020. We also processed a subset of them (n = 48) using the ARTIC protocol for  
88 Illumina sequencing. These data allowed us to demonstrate the ability of the ONETest to  
89 determine the genome sequences of SARS-CoV-2 from respiratory samples.

90

## 91 **RESULTS**

### 92 ***ONETest yields complete or near-complete SARS-CoV-2 genome more often than ARTIC***

93 The ONETest libraries of the 70 samples had a total of ~186 million paired-end reads, and each  
94 of the libraries had ~2.66 million paired-end reads on average (range, ~0.45 to ~6.14 million)  
95 (**Table S1**). This per-sample amount of sequencing is comparable to that used in a study <sup>3</sup>  
96 evaluating another target capture product (7.4 million 1x100 nt filtered reads per sample). Of  
97 the 70 ONETest libraries, 45 (64%) had a complete or near-complete SARS-CoV-2 genome

98 sequence that was > 29,000 nucleotides (nt) long and had > 90% well covered bases  
99 (specifically,  $\geq 10x$  depth). Even after sub-sampling, the ONETest libraries had a complete or  
100 near-complete genome sequence for 43 (61%) of the samples. Additionally, we processed 48  
101 (69%) of the 70 samples using ARTIC. The ARTIC libraries had a total of ~30 million paired-  
102 end reads, and each of the libraries had ~0.63 million paired-end reads on average (range,  
103 ~0.20 to ~2.1 million) (**Table S1**). This amount of sequencing is comparable to that in the  
104 ARTIC experiments performed by other groups (**Figure S1**). Of the 48 ARTIC libraries, 25  
105 (52%) had a complete or near-complete SARS-CoV-2 genome sequence.

106  
107 When considering the 48 samples for which both ONETest and ARTIC libraries were made, the  
108 mean percent poorly covered bases in the ONETest sequences was 23% (range, 0% to 100%),  
109 whereas that in the ARTIC sequences was 25% (range, 3% to 99%) (**Table S1**). For 34 (71%)  
110 of the samples, there was sufficient sequence information in both the ONETest and ARTIC  
111 libraries so that lineage could be assigned to both the ONETest and ARTIC sequences using  
112 *pangolin* (see below). We focused on these lineage-assigned matched ONETest and ARTIC  
113 library pairs to compare the genome sequences from the two methodologies.

114  
115 In the matched ONETest and ARTIC library pairs, there were fewer poorly covered bases (<  
116 10x depth) across the SARS-CoV-2 genome in the ONETest libraries than in the ARTIC  
117 libraries (**Figure 1; Figure S2**). Some of this difference may be explained by the fact that the  
118 ONETest libraries were sequenced deeper than the ARTIC libraries (almost four times deeper  
119 on average). However, a sub-sampling analysis indicated that even at similar sequencing  
120 depths, the ONETest libraries yielded better sequence coverage than the ARTIC libraries  
121 (**Figure S3**).

122

123 ***Regions with poorer sequence coverage in the ARTIC libraries than the ONETest libraries***

124 While there were several regions of the SARS-CoV-2 genome in the ARTIC libraries that had  
125 poor sequence coverage compared to the ONETest libraries, we closely examined one region  
126 that had particularly poor sequence coverage in the ARTIC libraries (**Figure 1**). We observed  
127 that depth of coverage was generally poor in the ~19,900-20,500 region of the SARS-CoV-2  
128 genome in the ARTIC libraries (**Figure 1**). This region is targeted by the ARTIC primer pairs  
129 66\_LEFT/66\_RIGHT (pool 2, MN908947.3: 19,844-20,255) and 67\_LEFT/67\_RIGHT (pool 1,  
130 MN908947.3: 20,172-20,572). In contrast, the ~19,900-20,500 region was well covered overall  
131 in the ONETest libraries (**Figure 1**). For example, depth of coverage across the SARS-CoV-2  
132 genome in the ARTIC library of sample 27 was high (mean, 3,937x), except in that region  
133 amplified by the two primer pairs (visualized using IGV<sup>13</sup> in **Figure S4**); on the other hand, the  
134 ONETest library of sample 27 had high depth of coverage across the virus' genome (mean,  
135 10,354x with duplicate reads and 1,237x without duplicate reads), even in the region targeted by  
136 those two problematic ARTIC PCR primer pairs (**Figure S4**).

137

138 ***Difference in sequence coverage between samples positive for three genes by PCR and***  
139 ***samples positive for one or two genes by PCR***

140 In some ONETest and ARTIC libraries, incomplete SARS-CoV-2 genome sequences might  
141 have arisen from low-titer samples. Because we used a qualitative PCR assay, we did not have  
142 quantitative estimates of viral titer in the samples. Instead, we considered the samples in which  
143 three SARS-CoV-2 genes (N, RdRp, and E) were detected by the PCR assay to be of relatively  
144 high titer (although some might be of low titer), whereas the samples in which one or two genes  
145 (N only, or both N and RdRp) were detected to be of relatively low titer (although some might be  
146 of high titer). We noticed that the ONETest and ARTIC libraries from the low-titer samples  
147 yielded less complete SARS-CoV-2 genome sequences than the libraries from the high-titer  
148 samples. The ONETest sequences from the low-titer samples had more poorly covered bases

149 (mean  $\pm$  standard deviation; 75%  $\pm$  28%) than those from the high-titer samples (2%  $\pm$  6%) ( $p <$   
150 0.001, Wilcoxon's test; including only the ONETest libraries with the matched ARTIC libraries).  
151 In line with this observation, the ARTIC sequences from the low-titer samples had more poorly  
152 covered bases (60%  $\pm$  34%) than those from the high-titer samples (12%  $\pm$  13%) ( $p <$  0.001;  
153 Wilcoxon's test).

154

### 155 ***ONETest and ARTIC determined SARS-CoV-2 genome sequences with concordant*** 156 ***lineage assignments***

157 For 34 samples, the consensus sequences from both the ONETest and ARTIC libraries could  
158 be assigned to a SARS-CoV-2 lineage using *pangolin*. In 24 (71%) of these samples, the  
159 lineage assignment was identical for the ONETest and ARTIC libraries (e.g., in sample 50, both  
160 the ONETest and ARTIC sequences were assigned to B.1.509). In the other 10 samples, the  
161 lineage assignment was nevertheless in the same major lineage (e.g., in sample 46, both the  
162 ONETest and ARTIC sequences were assigned to the B.1 lineage rather than the A.1 lineage).  
163 These differences in lineage assignment likely stemmed from differences in sequence coverage  
164 between the ONETest and ARTIC libraries. In the 10 samples, the mean difference in percent  
165 poorly covered bases between the ARTIC and ONETest sequences was 5.3%.

166

### 167 ***SARS-CoV-2 lineages detected in the ONETest libraries***

168 Of the 70 samples sequenced in this study using the ONETest, 45 had a complete or near-  
169 complete SARS-CoV-2 genome sequence. We found 15 distinct SARS-CoV-2 lineage  
170 assignments to the ONETest sequences of the samples (**Figure 2**).

171

## 172 **DISCUSSION**

173 Vaccines against SARS-CoV-2 are presently being administered around the globe, but we have  
174 yet to see how effectively the vaccines will protect our populations from the new variants of



175 concerns. Having multiple technologies in our SARS-CoV-2 genome sequencing toolbox  
176 should help to heighten our vigilance towards new SARS-CoV-2 variants that may escape our  
177 vaccines. Here, we propose the ONETest target capture NGS methodology to sequence  
178 SARS-CoV-2 genomes to aid in efforts to track SARS-CoV-2 variants.

179

180 Using the ONETest and ARTIC, we sequenced SARS-CoV-2 genomes from archived samples  
181 in which SARS-CoV-2 had been detected by a FDA EUA qualitative PCR assay. Our data  
182 demonstrate that the ONETest can yield complete SARS-CoV-2 genome sequences more often  
183 than ARTIC (64% versus 52%). While relatively shallow sequencing of the ARTIC libraries may  
184 account for some of the other poorly covered regions, a sub-sampling analysis indicates that the  
185 ONETest produces complete genome sequences more often than ARTIC even at about one  
186 fourth the amount of sequencing on average. Nonetheless, there are consistently poorly  
187 covered regions in the SARS-CoV-2 genome across the ARTIC libraries. In particular, the  
188 ~19,900-20,500 SARS-CoV-2 genome region targeted by two ARTIC PCR primer pairs (e.g.,  
189 sample 27) is poorly covered in many ARTIC libraries, even though other genomic regions in  
190 the same libraries are well covered. As shown by an analysis of the SARS-CoV-2 genome  
191 sequences deposited in GISAID <sup>14</sup>, many publicly available sequences contain problematic  
192 regions (i.e., contiguous stretches of 200 Ns) around the 20,000th nucleotide position. Many of  
193 the genome sequences were produced using an amplicon NGS methodology, in particular  
194 ARTIC. Furthermore, by comparing the lineage assignments of the ONETest and ARTIC  
195 sequences, which are generally concordant, we show that the ONETest can provide quality  
196 genome sequences to study the evolution and epidemiology of SARS-CoV-2.

197

198 In this study, we did not have quantitative estimates of viral load (e.g., cycle threshold values  
199 from a quantitative PCR assay) for the samples examined here to directly observe the effect of  
200 viral load on the quality of the consensus sequences. By using the number of target genes

201 detected by a PCR assay (three genes versus one or two genes) as a proxy instead, we find  
202 that the ONETest and ARTIC consensus sequences are of higher quality in the samples  
203 positive for three genes, suggesting that the partial genome sequences in about 40% of the  
204 ONETest libraries and about 50% of the ARTIC libraries resulted from low viral titer.  
205  
206 Target capture NGS methodologies, such as the ONETest, should be able to detect mutations  
207 that can impact the performance of amplicon NGS methodologies, such as ARTIC. Kim et al.<sup>3</sup>  
208 showed a case in which target capture NGS detected a large 382 nt deletion in the ORF8 gene  
209 of SARS-CoV-2 that ablated sequence coverage in four contiguous genes (ORF3a, E, M, and  
210 ORF6) in the ARTIC library due to PCR amplification failure. Although we did not encounter  
211 such a dramatic case in this study, we anticipate that as we sequence more samples using the  
212 ONETest, the ONETest will detect large deletions in the SARS-CoV-2 genome that could  
213 severely reduce sequence coverage when using amplicon NGS methodologies. This  
214 advantage of target capture NGS approaches is important as new SARS-CoV-2 genetic  
215 mutations of unpredictable nature continue to emerge.  
216  
217 Our data show the ability of the ONETest to determine the genome sequences of SARS-CoV-2  
218 in respiratory samples. Importantly, our data indicate that the ONETest is less prone to loss of  
219 sequence coverage that may be caused by poor or failed target binding (e.g., the amplicon  
220 dropouts in the ARTIC libraries shown here and in studies by other groups), which can  
221 ultimately result in inaccurate SARS-CoV-2 genotyping and lineage identification. The added  
222 value of the ONETest to characterize multiple respiratory pathogens, although not assessed in  
223 this study, would help us to better understand the epidemiology of respiratory pathogens in the  
224 post COVID-19 era. Furthermore, Fusion Genomics Corp., at the time of this writing, is  
225 validating a fully automated ONETest workflow that allows for flexible sample batching (i.e., as  
226 few as eight libraries to as many as 384 libraries per sequencing run).

227

## 228 **MATERIALS AND METHODS**

### 229 ***Ethics review***

230 Approval for this study was obtained from the University of Florida Institutional Review Board  
231 (IRB202001328).

232

### 233 ***Respiratory samples***

234 Nasopharyngeal (NP) swabs (n = 61) and endotracheal aspirates (n = 9) were collected from  
235 patients, who had respiratory illness and were suspected to have COVID-19, at UF Health  
236 Shands Hospital in May (n = 31) and in July (n = 39), 2020. Among the patients, 30 (43%) were  
237 male and 40 (57%) were female. The mean age of the patients ( $\pm$  standard deviation) was 46.1  
238 ( $\pm$  19.8) years (range, 5 to 102 years; interquartile range, 27.8 to 54.0 years). Three patients  
239 had two separate samples collected seven to 12 days apart; one patient had four samples, two  
240 samples collected in May (one NP swab and one endotracheal aspirate on the same day) and  
241 two samples collected in July that were duplicate samples. The samples were initially tested for  
242 SARS-CoV-2 using a FDA Emergency Use Authorization qualitative PCR assay (GeneFinder™  
243 COVID-19 Plus RealAmp Kit from OSANG Healthcare Co. Ltd., South Korea), which targets the  
244 RdRp, N, and E genes. We retrospectively selected 70 samples in which SARS-CoV-2 had  
245 been detected by the PCR assay.

246

### 247 ***RNA extraction***

248 Nucleic acids were isolated from 200  $\mu$ L of the samples and eluted in 100  $\mu$ L, of which 10  $\mu$ L  
249 was tested for SARS-CoV-2 by the ELITe InGenius® platform (ELITechGroup, Puteaux, France)  
250 using the GeneFinder™ COVID-19 Plus RealAmp Kit, as per the manufacturer's instructions.  
251 The remaining 90  $\mu$ L of de-identified RNA extracts were then shipped to Fusion Genomics Corp.  
252 (Burnaby, BC, Canada). Each RNA extract was treated with DNase (MilliporeSigma Canada,

253 Ontario) and partitioned into two aliquots. One aliquot was processed using the ARTIC protocol  
254 and the other using the ONETest protocol.

255

### 256 **ARTIC protocol**

257 We processed 2 µL of RNA extract from each sample using the ARTIC Illumina protocol  
258 (<https://www.protocols.io/view/covid-19-artic-v3-illumina-library-construction-an-bibtkann>). This  
259 protocol utilizes two pools of ARTIC V3 primer pairs to amplify 98 ~400 nt partially overlapping  
260 regions that tile the entire SARS-CoV-2 genome ([https://github.com/artic-network/artic-ncov2019/blob/master/primer\\_schemes/nCoV-2019/V3/](https://github.com/artic-network/artic-ncov2019/blob/master/primer_schemes/nCoV-2019/V3/)), which were ordered from Sigma-  
261 Aldrich (Oakville, ON, Canada). Libraries were constructed using TruSeq Nano from Illumina Inc.  
262 (San Diego, CA, USA), as per the manufacturer's instructions. Libraries were normalized, pooled  
263 together, and sequenced as 2x150 nt reads on an Illumina NextSeq 500 instrument (San Diego,  
264 CA, USA). Reads from these libraries were analyzed using a bioinformatics pipeline (v1.3.0;  
265 <https://github.com/connor-lab/ncov2019-artic-nf>) that automates the ARTIC data analysis  
266 protocol for Illumina reads (<https://artic.network/ncov-2019/ncov2019-bioinformatics-sop.html>),  
267 which utilizes *bwa mem*<sup>15</sup>, *samtools*<sup>16</sup>, and *iVar*<sup>17</sup>.

269

### 270 **ONETest: probe design**

271 We have expanded the ONETest probe set (QuantumProbes™;  
272 <http://www.fusiongenomics.com/onetestplatform/>), which originally targets non-SARS-CoV-2  
273 respiratory pathogens, to capture the entire SARS-CoV-2 genome based on the Wuhan-Hu-1  
274 reference sequence (NC\_045512.2). Additionally, we designed probes to capture the  
275 nucleotide variants frequently observed in SARS-CoV-2 genomes (> 1%; retrieved from NCBI  
276 GenBank in July, 2020) and to cover the GC-poor regions (< 35% GC) of the virus' genome.

277

### 278 **ONETest: library preparation, target capture, and NGS**

279 Next, we processed 11  $\mu$ L of RNA extract from each sample using the ONETest protocol. RNA  
280 extracts were then treated with deoxyribonuclease from Sigma-Aldrich (Oakville, ON, Canada).  
281 Target-enriched Illumina-compatible libraries were prepared from RNA using the ONETest kit  
282 from Fusion Genomics Corp. (Burnaby, BC, Canada). Total RNA was subject to rRNA and  
283 mRNA removal using biotin-labeled depletion probes captured via magnetic streptavidin-coated  
284 beads. Cleaned RNA was then reverse transcribed using random primers with adapters, and  
285 the resulting cDNA was fragmented. Whole transcriptome amplification was then performed,  
286 and cDNA was ligated with Illumina-compatible indexed adapters, according to the  
287 manufacturer's instructions. The indexed libraries were mixed with Illumina adapter-specific  
288 blocking reagents, human Cot-1 placental DNA from Sigma-Aldrich (Oakville, ON, Canada), and  
289 target-specific biotin-labeled probes in hybridization solution. Hybridization occurred overnight  
290 at 50°C. The target-probe duplexes were then captured by using magnetic beads and by  
291 iteratively washing off unhybridized nucleic acids with increasingly stringent buffers. Enriched  
292 libraries were universally re-amplified for 20 cycles using Illumina adapter-specific primers.  
293 Normalization and pooling of the enriched libraries were based on quantification using the  
294 Quant-iT dsDNA kit (Life Technologies, ON, Canada). Molar quantification of the pooled library  
295 was performed using GeneRead Library Quant Kit for Illumina (Qiagen Canada, ON). The  
296 pooled library was sequenced as 2x150 nt reads on an Illumina NextSeq 500 instrument, as per  
297 the manufacturer's instructions.

298

### 299 ***ONETest: NGS data analysis***

300 Reads from the ONETest libraries were analyzed using an in-house bioinformatics pipeline.  
301 The pipeline preprocesses raw NGS reads using a custom C/C++ program (removing adapter  
302 sequences, trimming off poor-quality bases of < Q30, and filtering out reads of < 50 nt and  
303 reads with low complexity of normalized trimer entropy of < 60, poor mean base quality of <  
304 Q27, or percent G of > 40%). Reads were discarded that mapped to the human genome

305 sequence (GRCh38.p13, release 35) using *bowtie2* v2.4.2<sup>18</sup>. Then, it aligned the remaining  
306 reads to the SARS-CoV-2 Wuhan-Hu-1 reference sequence (MN996528.1) using *bowtie2* (with  
307 the settings '--very-sensitive-local --score-min G,100,9'), marking duplicate reads using  
308 *samtools* v1.11<sup>16</sup>. Finally, the pipeline performed iterative comparative assembly (up to five  
309 attempts) to reconstruct consensus SARS-CoV-2 genome sequences using *bcftools* v1.11.  
310 Nucleotides were called at positions that were covered by  $\geq 10$  reads (excluding duplicate  
311 reads); otherwise, they were masked as Ns. Discounting poor-quality bases of  $< Q15$  and  
312 excluding duplicate reads, nucleotide variants were filtered out unless (1) their quality score was  
313  $\geq Q15$ , (2) they were supported by  $> 1$  forward aligned read and  $> 1$  reverse aligned read, (3)  
314 they were supported by  $> 25\%$  of the reads, and (4) the number of variant-supporting reads is  $\geq$   
315 the number of reference-supporting reads; a maximum depth of 30,000 was allowed during  
316 pileup. Indels were normalized after calling. The pipeline was implemented in C/C++ and  
317 Python using a combination of in-house software and third-party tools, including *Biopython*  
318 v1.78<sup>19</sup>, *bedtools* v2.29.2<sup>20</sup>, *pybedtools* v0.8.1<sup>21</sup>, *samtools/bcftools/htslib* v1.11<sup>16</sup>, and  
319 *Snakemake* v5.26.1<sup>22</sup>.

320

### 321 ***ONETest: sub-sampling analysis***

322 We sequenced the ONETest libraries at 2.66 million 2x150 nt reads on average, nearly four  
323 times as deep as that of the ARTIC libraries (0.63 million 2x150 nt reads on average). To  
324 assess whether the observed differences in genome coverage between the ONETest and  
325 ARTIC libraries might have resulted from deeper sequencing of the ONETest libraries, we  
326 conducted a sub-sampling analysis in which we compared down-sampled ONETest libraries  
327 with the full ARTIC libraries. Using *seqtk* v1.3 (<https://github.com/lh3/seqtk>), we randomly  
328 down-sampled (without replacement) the 2x150 nt reads of each ONETest library so that the

329 resulting library had the same number of reads as the matched ARTIC library; each ONETest  
330 library was sub-sampled three times in this manner to generate three simulated replicates of the  
331 library. Then, we analyzed those sub-sampled reads to determine which bases were poorly  
332 covered across the SARS-CoV-2 genome in the simulated ONETest libraries.

333

### 334 ***Depth of coverage analysis***

335 Using *bedtools*, we generated depth of sequence coverage profiles for the full ONETest libraries  
336 and the sub-sampled ONETest libraries based on *bowtie2* read alignments and the ARTIC  
337 libraries based on the *bwa mem* read alignments. For the ONETest libraries, we excluded  
338 duplicate reads, but for the ARTIC libraries, we included duplicate reads. Visualization was  
339 done in R using *ggplot2*<sup>23</sup>.

340

### 341 ***Lineage analysis***

342 We identified the lineages of SARS-CoV-2 in the samples based on the ONETest and ARTIC  
343 consensus sequences using *pangolin* v2.1.10 (<https://github.com/cov-lineages/pangolin>). This  
344 tool assigns SARS-CoV-2 lineages according to a dynamic nomenclature system<sup>24</sup>.

345

### 346 **DATA AVAILABILITY**

347 The complete or near-complete consensus SARS-CoV-2 genome sequences from the ONETest  
348 libraries are available via GISAID (accessions: To be deposited during submission). All de-  
349 identified FastQ files (with human reads removed) of the ONETest and ARTIC libraries are  
350 publicly available via the NCBI Short Read Archive (BioProject: To be deposited during  
351 submission).

352

### 353 **FUNDING STATEMENT**

354 This study was funded by Fusion Genomics Corporation and supported in part by the  
355 Department of Pathology, Immunology and Laboratory Medicine, University of Florida  
356 (Gainesville, FL, USA).

357

## 358 **ACKNOWLEDGMENTS**

359 We thank Dr. Mohammad A. Qadir (Fusion Genomics Corp.) for providing guidance throughout  
360 this study and constructive feedback on this manuscript and Greg Stazyk (Fusion Genomics  
361 Corp.) for setting up the computing infrastructure that enabled this study. We are grateful to  
362 Compute Canada and Simon Fraser University for providing the computing resources that  
363 facilitated this study. Also, we gratefully acknowledge the support of the staff from the  
364 University of Florida Health Shands Hospital Laboratory.

365

## 366 **COMPETING INTERESTS**

367 S. H. Z., S. M. A., B. S. K., M. H. L., J. K., and H. D. are current or former employees and/or  
368 shareholders of Fusion Genomics Corp. H. J. H. and K. H. R. do not have competing interests  
369 to declare.

370

## 371 **AUTHOR CONTRIBUTIONS**

372 S. H. Z.: Conceptualization, Methodology, Software, Formal analysis, Investigation, Data  
373 curation, Visualization, Writing – original draft preparation, Writing – review and editing.

374 S. M. A.: Conceptualization, Methodology, Formal analysis, Investigation, Data curation, Project  
375 administration, Writing – review and editing.

376 B. S. K.: Conceptualization, Methodology, Formal analysis, Investigation, Data curation, Project  
377 administration, Writing – review and editing.

378 M. H. L.: Methodology, Software, Formal analysis, Investigation, Writing – review and editing.

379 J. K.: Methodology, Formal analysis, Data curation, Investigation.



380 H. D.: Formal analysis, Data curation, Investigation, Writing – review and editing.

381 H. J. H.: Methodology, Data curation, Resources.

382 K. H. R.: Conceptualization, Methodology, Investigation, Data curation, Resources, Writing –

383 review and editing.

384

385 **FIGURES**

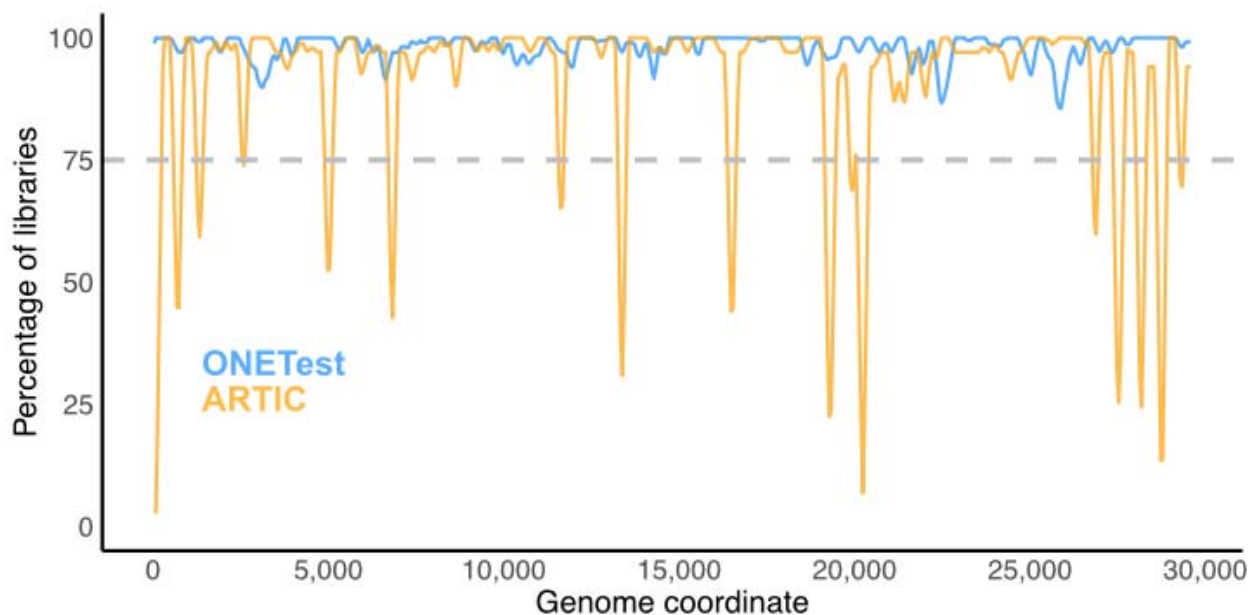

386  
387 **Figure 1.** Aggregate summary of sequence coverage over the SARS-CoV-2 genome in the  
388 ONETest and ARTIC libraries from the samples examined in this study. Here, we considered  
389 only the 34 samples for which lineage could be assigned to both its ONETest and ARTIC  
390 sequences using *pangolin*. For each position in the SARS-CoV-2 reference sequence targeted  
391 by the ARTIC PCR primers (MN996528.1: 30 to 29,866), we computed the percentage of  
392 samples in which its depth of coverage was  $\geq 10$  (excluding duplicates for the ONETest libraries  
393 and including duplicates for the ARTIC libraries). This percentage was averaged across the  
394 positions of each 200 nt partially overlapping window across the genome (skip size of 50 nt).  
395 Poorly covered regions in the SARS-CoV-2 genome appear as troughs below the dashed line.  
396

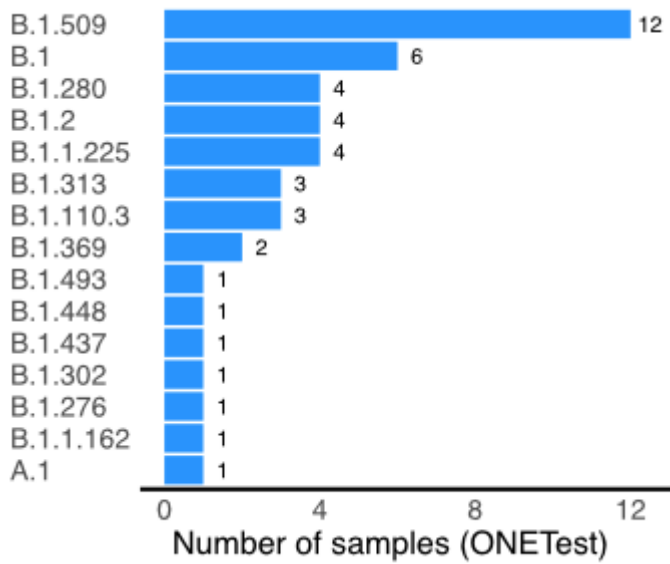

397

398 **Figure 2.** SARS-CoV-2 lineages identified in the samples examined in this study using the  
399 ONETest. Lineage was assigned to the complete or near-complete SARS-CoV-2 genome  
400 sequences from the ONETest libraries of 45 samples.

401

402 **SUPPLEMENTARY MATERIAL**

403 **Table S1.** Information about the ONETest and ARTIC libraries and results of SARS-CoV-2  
404 genome sequence analysis. For each sample, the sequence name in GISAID accession,  
405 collection date, and sample type, and the SARS-CoV-2 genes (N, RdRp, and E) detected by the  
406 OSANG PCR assay are indicated. For each library, the total number of paired-end reads, the  
407 number of reads mapped to the SARS-CoV-2 genome (for the ONETest libraries, read pairs  
408 were counted, but for the ARTIC libraries, reads were counted), the length of its consensus  
409 genome sequence (excluding the Ns at the ends), and mean depth of coverage over the  
410 genome (excluding duplicate reads in the ONETest libraries, and including duplicate reads in  
411 the ARTIC libraries), the lineage assigned to its consensus sequence using *pangolin* are  
412 provided. Abbreviations: NP = nasopharyngeal; ETA = endotracheal aspirates; N/A = not  
413 assigned or not available.

414

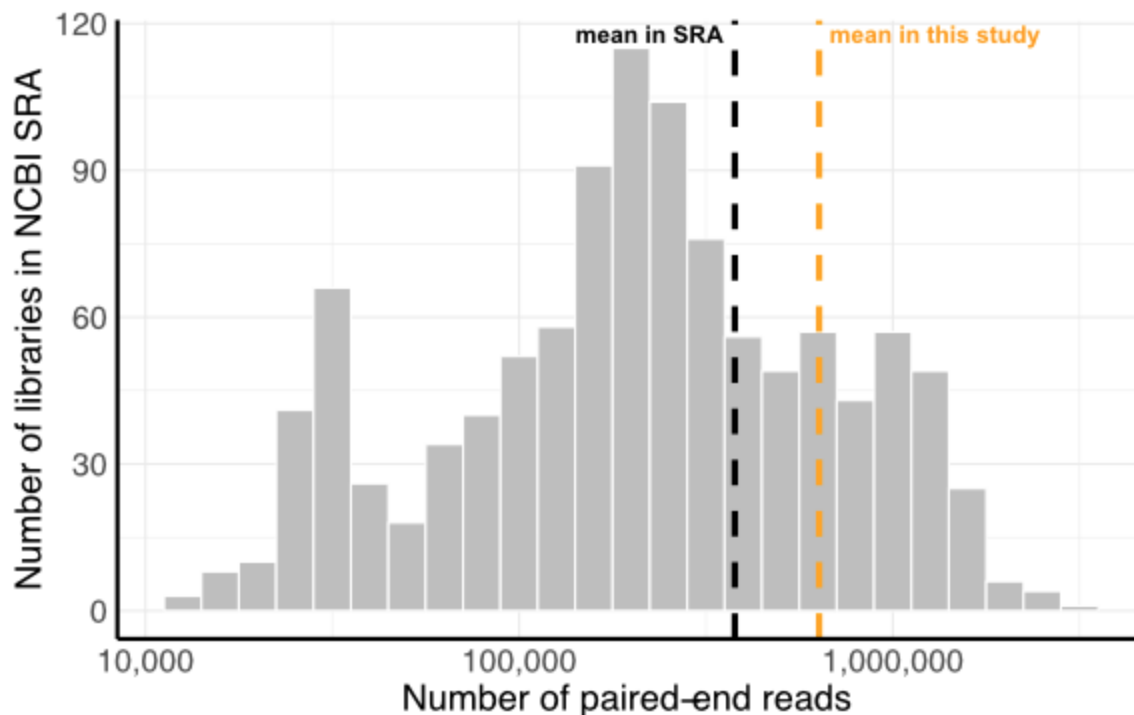

415  
416 **Figure S1.** Amount of sequencing in the ARTIC Illumina libraries in the NCBI Short Read  
417 Archive. We searched the SRA for 2x150 nt ARTIC Illumina libraries using the query  
418 “((((Severe acute respiratory syndrome coronavirus 2[Organism]) AND Illumina[Platform]) AND  
419 PAIRED[Layout]) AND 150[ReadLength]) AND AMPLICON[Strategy]) AND ARTIC” and then  
420 again using the same query except “149[ReadLength]” (accessed on Mar. 6, 2021). Ten  
421 libraries with < 10,000 paired-end reads were excluded. Also, we excluded entries from  
422 SRP287442, which involved sequencing SARS-CoV-2 genomes in cell cultures and mouse  
423 models. The vertical black dashed line indicates the mean number of paired-end reads in 1,089  
424 ARTIC libraries in the SRA ( $0.38 \text{ million} \pm 0.42 \text{ million}$ ), and the orange line indicates the mean  
425 number of paired-end reads in the ARTIC libraries in this study ( $0.63 \text{ million} \pm 0.30 \text{ million}$ ).  
426

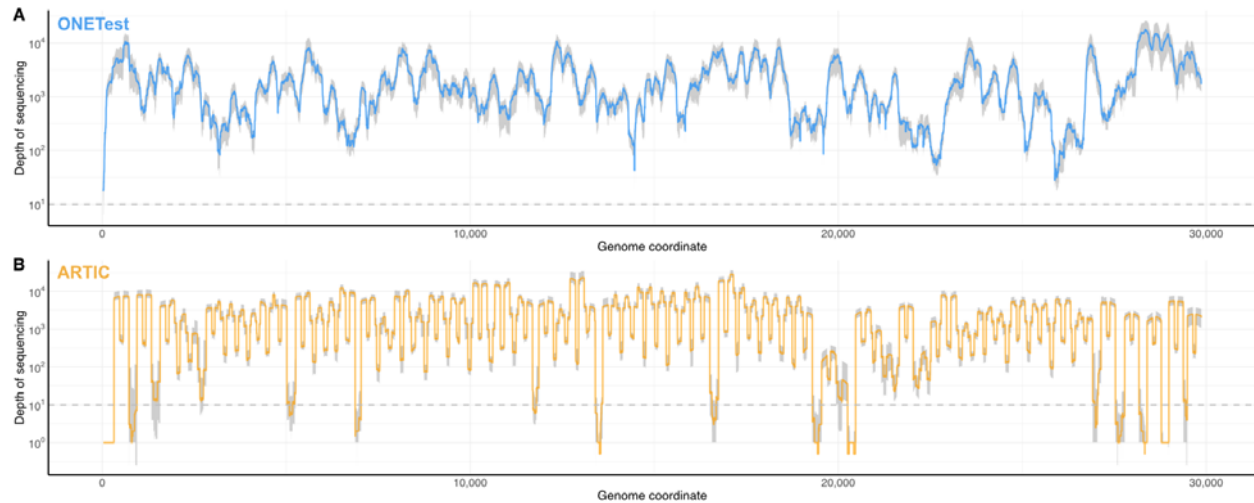

427

428 **Figure S2.** Depth of sequencing coverage over the SARS-CoV-2 genome in the 34 matched

429 pairs of ONETest library (A) and ARTIC library (B) for which lineage could be assigned.

430 Duplicate reads in the ONETest libraries were excluded, and duplicate reads in the ARTIC

431 libraries were included. The y-axis is shown in log10 scale; zeroes were set to one for

432 visualization in log10 scales. The colored line represents the median, and the grey area

433 indicates the 25%-75%tile range. The dashed horizontal line indicates the minimum threshold

434 ( $\geq 10$  depth) to call a base in the consensus genome sequences.

435

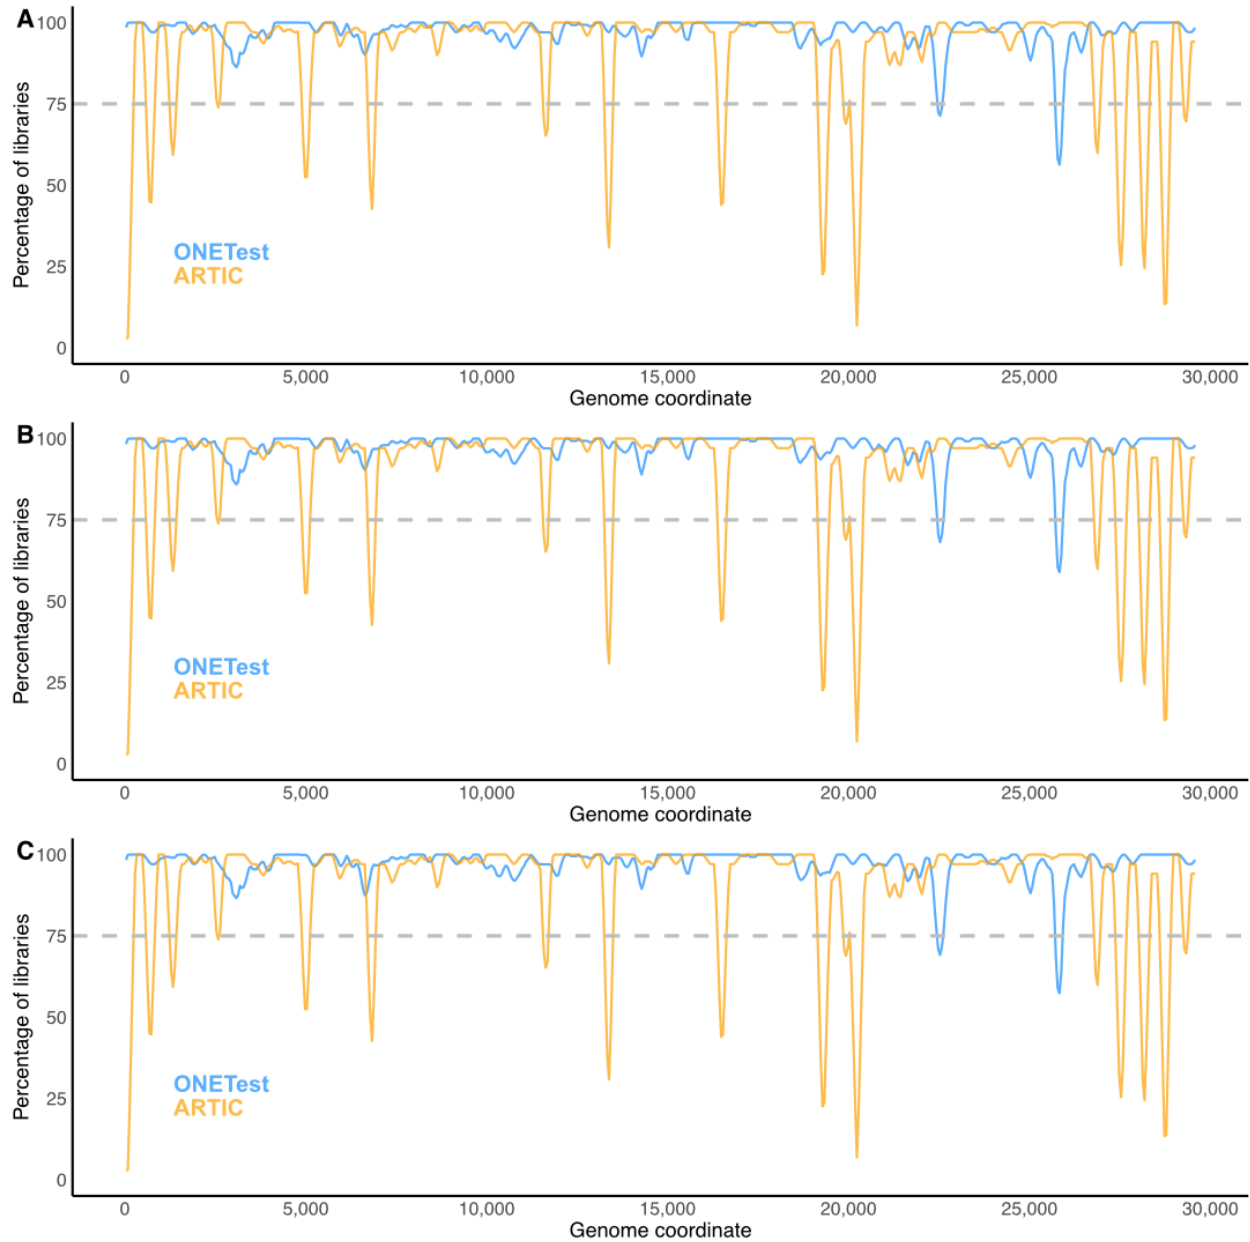

436

437 **Figure S3.** Aggregate summary of sequence coverage over the SARS-CoV-2 genome in the  
438 sub-sampled ONETest libraries and the full ARTIC libraries. For each of the 34 samples for  
439 which lineage could be assigned to both its ONETest and ARTIC sequences, we randomly sub-  
440 sampled its ONETest library three times so that the sub-sampled read sets had the exact  
441 number of raw reads as the matched ARTIC library. These data were analyzed the same way  
442 as described in **Figure 1**.

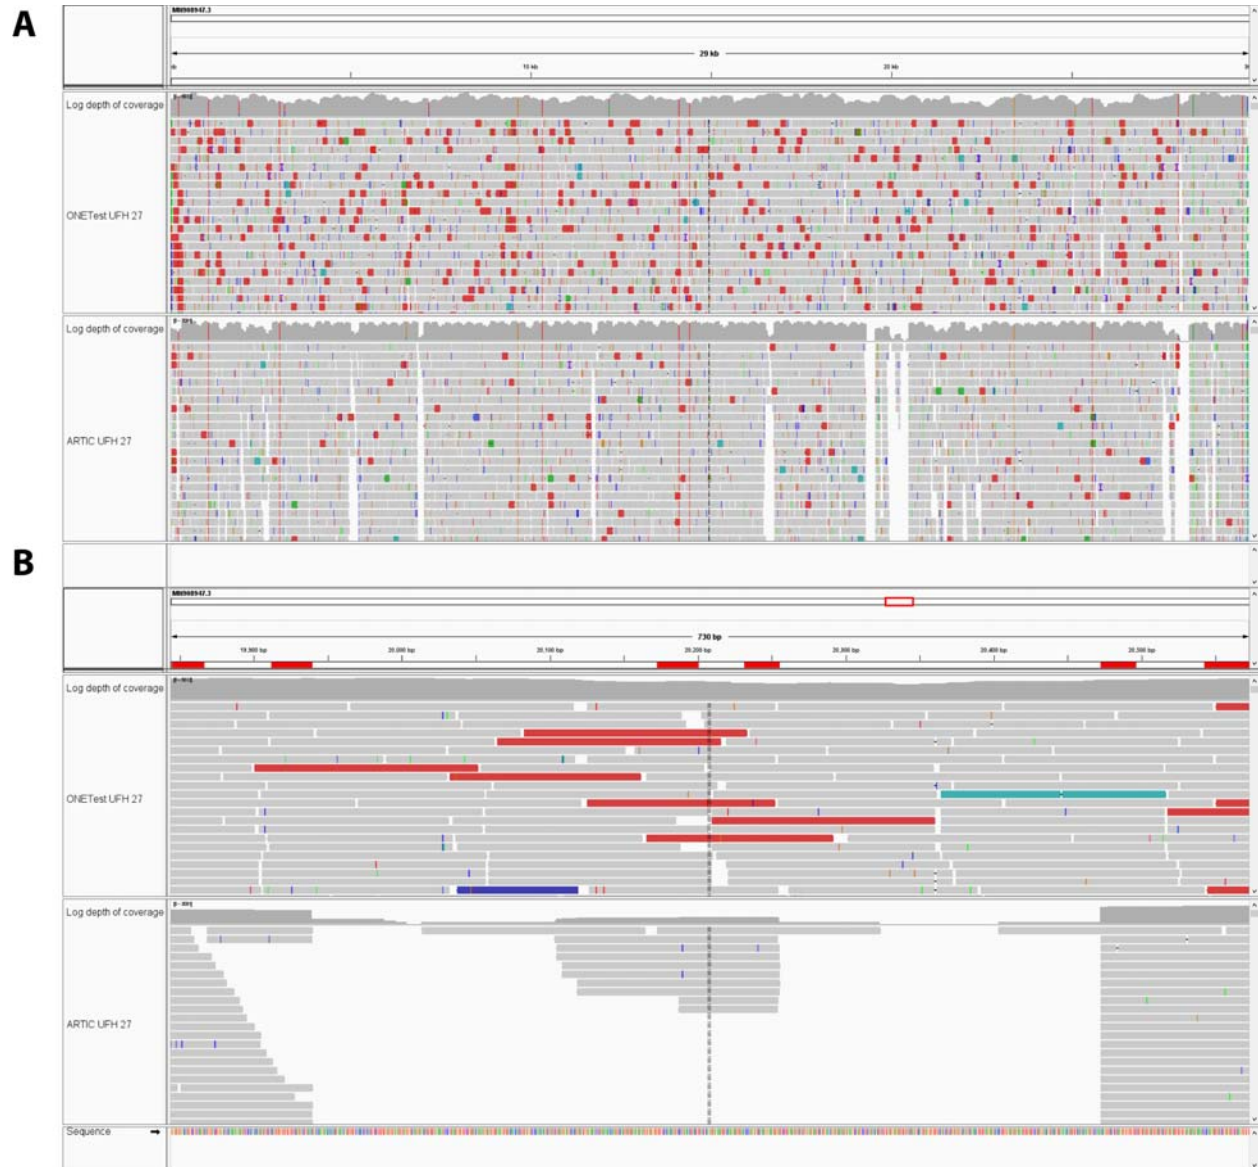

443

444 **Figure S4.** Read alignments over the entire SARS-CoV-2 genome (MN996528.1) (A) and over  
445 the 19,844-20,572 region (B) in the ONETest library and the ARTIC library of sample 27. The  
446 19,844-20,572 region is targeted by two ARTIC V3 primer pairs (66\_LEFT/66\_RIGHT,  
447 MN908947.3: 19,844-20,255; 67\_LEFT/67\_RIGHT, MN908947.3: 20,172-20,572). Visualization  
448 was performed using IGV.

449



## 450 REFERENCES

- 451 1. Tyson JR, James P, Stoddart D, et al. Improvements to the ARTIC multiplex PCR method  
452 for SARS-CoV-2 genome sequencing using nanopore. doi:10.1101/2020.09.04.283077
- 453 2. Itokawa K, Sekizuka T, Hashino M, Tanaka R, Kuroda M. Disentangling primer interactions  
454 improves SARS-CoV-2 genome sequencing by multiplex tiling PCR. *PLOS ONE*.  
455 2020;15(9):e0239403. doi:10.1371/journal.pone.0239403
- 456 3. Kim KW, Deveson IW, Pang CNI, et al. Respiratory viral co-infections among SARS-CoV-2  
457 cases confirmed by virome capture sequencing. *Scientific Reports*. 2021;11(1).  
458 doi:10.1038/s41598-021-83642-x
- 459 4. Chen AT, Altschuler K, Zhan SH, Chan YA, Deverman BE. COVID-19 CG enables SARS-  
460 CoV-2 mutation and lineage tracking by locations and dates of interest. *Elife*. 2021;10.  
461 doi:10.7554/eLife.63409
- 462 5. Iacobucci G. Covid-19: New UK variant may be linked to increased death rate, early data  
463 indicate. *BMJ*. 2021;372:n230.
- 464 6. Tegally H, Wilkinson E, Giovanetti M, et al. Emergence of a SARS-CoV-2 variant of  
465 concern with mutations in spike glycoprotein. *Nature*. Published online March 9, 2021.  
466 doi:10.1038/s41586-021-03402-9
- 467 7. Charre C, Ginevra C, Sabatier M, et al. Evaluation of NGS-based approaches for SARS-  
468 CoV-2 whole genome characterisation. doi:10.1101/2020.07.14.201947
- 469 8. Nasir JA, Kozak RA, Aftanas P, et al. A Comparison of Whole Genome Sequencing of  
470 SARS-CoV-2 Using Amplicon-Based Sequencing, Random Hexamers, and Bait Capture.  
471 *Viruses*. 2020;12(8). doi:10.3390/v12080895
- 472 9. Briese T, Kapoor A, Mishra N, et al. Virome Capture Sequencing Enables Sensitive Viral  
473 Diagnosis and Comprehensive Virome Analysis. *mBio*. 2015;6(5). doi:10.1128/mbio.01491-  
474 15
- 475 10. Chalkias S, Gorham JM, Mazaika E, et al. ViroFind: A novel target-enrichment deep-  
476 sequencing platform reveals a complex JC virus population in the brain of PML patients.  
477 *PLOS ONE*. 2018;13(1):e0186945. doi:10.1371/journal.pone.0186945
- 478 11. Zakrzewski F, Geldon L, Rump A, et al. Targeted capture-based NGS is superior to  
479 multiplex PCR-based NGS for hereditary BRCA1 and BRCA2 gene analysis in FFPE tumor  
480 samples. *BMC Cancer*. 2019;19(1):396.
- 481 12. Himsworth CG, Duan J, Prystajeky N, et al. Targeted Resequencing of Wetland Sediment  
482 as a Tool for Avian Influenza Virus Surveillance. *Journal of Wildlife Diseases*.  
483 2020;56(2):397. doi:10.7589/2019-05-135
- 484 13. Robinson JT, Thorvaldsdóttir H, Winckler W, et al. Integrative genomics viewer. *Nature*  
485 *Biotechnology*. 2011;29(1):24-26. doi:10.1038/nbt.1754
- 486 14. Cotten M, Bugembe DL, Kaleebu P, Phan MVT. Alternate primers for whole-genome  
487 SARS-CoV-2 sequencing. *Virus Evolution*. Published online 2021. doi:10.1093/ve/veab006

- 488 15. Li H. Aligning sequence reads, clone sequences and assembly contigs with BWA-MEM.  
489 *arXiv [q-bioGN]*. Published online March 16, 2013. <http://arxiv.org/abs/1303.3997>
- 490 16. Li H, Handsaker B, Wysoker A, et al. The Sequence Alignment/Map format and SAMtools.  
491 *Bioinformatics*. 2009;25(16):2078-2079.
- 492 17. Grubaugh ND, Gangavarapu K, Quick J, et al. An amplicon-based sequencing framework  
493 for accurately measuring intrahost virus diversity using PrimalSeq and iVar. *Genome Biol*.  
494 2019;20(1):8.
- 495 18. Langmead B, Salzberg SL. Fast gapped-read alignment with Bowtie 2. *Nature Methods*.  
496 2012;9(4):357-359. doi:10.1038/nmeth.1923
- 497 19. Cock PJA, Antao T, Chang JT, et al. Biopython: freely available Python tools for  
498 computational molecular biology and bioinformatics. *Bioinformatics*. 2009;25(11):1422-  
499 1423. doi:10.1093/bioinformatics/btp163
- 500 20. Quinlan AR, Hall IM. BEDTools: a flexible suite of utilities for comparing genomic features.  
501 *Bioinformatics*. 2010;26(6):841-842. doi:10.1093/bioinformatics/btq033
- 502 21. Dale RK, Pedersen BS, Quinlan AR. Pybedtools: a flexible Python library for manipulating  
503 genomic datasets and annotations. *Bioinformatics*. 2011;27(24):3423-3424.  
504 doi:10.1093/bioinformatics/btr539
- 505 22. Koster J, Rahmann S. Snakemake--a scalable bioinformatics workflow engine.  
506 *Bioinformatics*. 2012;28(19):2520-2522. doi:10.1093/bioinformatics/bts480
- 507 23. Wickham H, Chang W, Others. ggplot2: An implementation of the Grammar of Graphics. *R*  
508 *package version 0 7*, URL: <http://CRAN.R-project.org/package=ggplot2>. 2008;3.
- 509 24. Rambaut A, Holmes EC, O'Toole Á, et al. A dynamic nomenclature proposal for SARS-  
510 CoV-2 lineages to assist genomic epidemiology. *Nat Microbiol*. 2020;5(11):1403-1407.
- 511
